# Supplementary material
Source: PubMed Central journal article supplement (PMC5376972)
Supplement: EMBR-18-586-s002.pdf [file EMBR-18-586-s002.pdf]

## Expanded View Figures

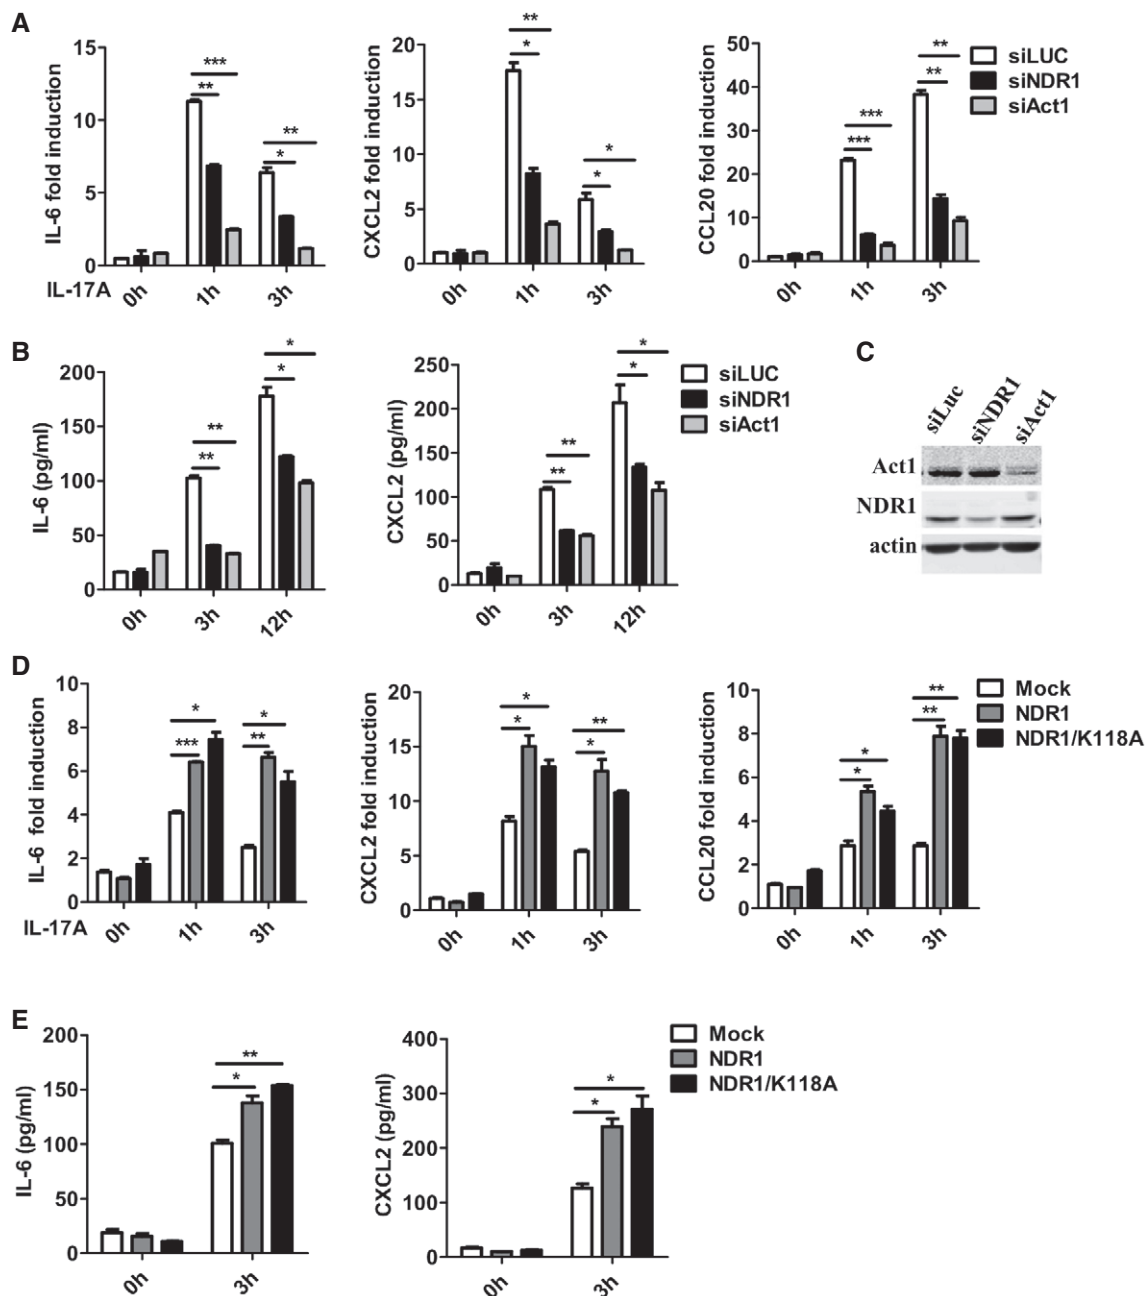

**Figure EV1. NDR1 promotes the IL-17-induced expression of pro-inflammatory cytokines in HeLa cells in a kinase activity-independent manner.**

A–C HeLa cells were transfected with NDR1 siRNA, Act1 siRNA (positive control) or luciferase siRNA (negative control) and then stimulated with IL-17 (50 ng/ml) for 0, 1, 3, or 12 h. The mRNA levels and production of IL-6, CXCL2, and CCL20 were analyzed by real-time PCR (A) and ELISA (B), respectively. The efficiency of knockdown was detected by Western blot (C).

D, E HeLa cells were transfected with mock, NDR1, or NDR1/K118A plasmids and then stimulated with IL-17 (50 ng/ml) for the indicated times. The induction of IL-6, CXCL2, and CCL20 mRNA expression were analyzed by real-time PCR (D) and ELISA (E), respectively.

Data information: \* $P < 0.05$ , \*\* $P < 0.01$ , and \*\*\* $P < 0.001$  (unpaired, two-tailed Student's  $t$ -test). Similar results were obtained in three (A–C) or two (D, E) independent experiments. Error bars are mean  $\pm$  SEM values.

Source data are available online for this figure.

**Figure EV2. NDR1 promotes the IL-17F-induced expression of pro-inflammatory cytokines.**

- A WT and *Ndr1*-KO MEFs transfected with a retrovirus encoding mock, Flag-NDR1, or Flag-NDR1/K118A were treated with IL-17 (100 ng/ml) for 0 or 6 h. The mRNA levels of *IL-6*, *CXCL2*, and *CCL20* were analyzed by real-time PCR.
- B, C WT and *Ndr1*-KO MEFs (B) or primary astrocytes (C) were treated with IL-17F (100 ng/ml) for the indicated times, and the induction of *IL-6*, *CXCL2*, *CCL20*, and *CXCL1* mRNA expression was analyzed by real-time PCR.
- D HeLa cells were transfected with NDR1 siRNA or control siRNA and then were treated with IL-17F (50 ng/ml) for 0, 1, or 3 h, and the induction of *IL-6*, *CXCL2*, and *CCL20* mRNA expression was analyzed by real-time PCR.
- E, F WT and *Ndr1*-KO MEFs were treated with TNF- $\alpha$  (20 ng/ml) (D) or IL-1 $\beta$  (10 ng/ml) (E) for the indicated times, and the induction of *IL-6*, *CXCL2*, *CCL20*, and *CXCL1* mRNA expression was analyzed by real-time PCR.

Data information: \* $P < 0.05$ , \*\* $P < 0.01$  (unpaired, two-tailed Student's *t*-test). Similar results were obtained in at least two independent experiments. Error bars are mean  $\pm$  SEM values.

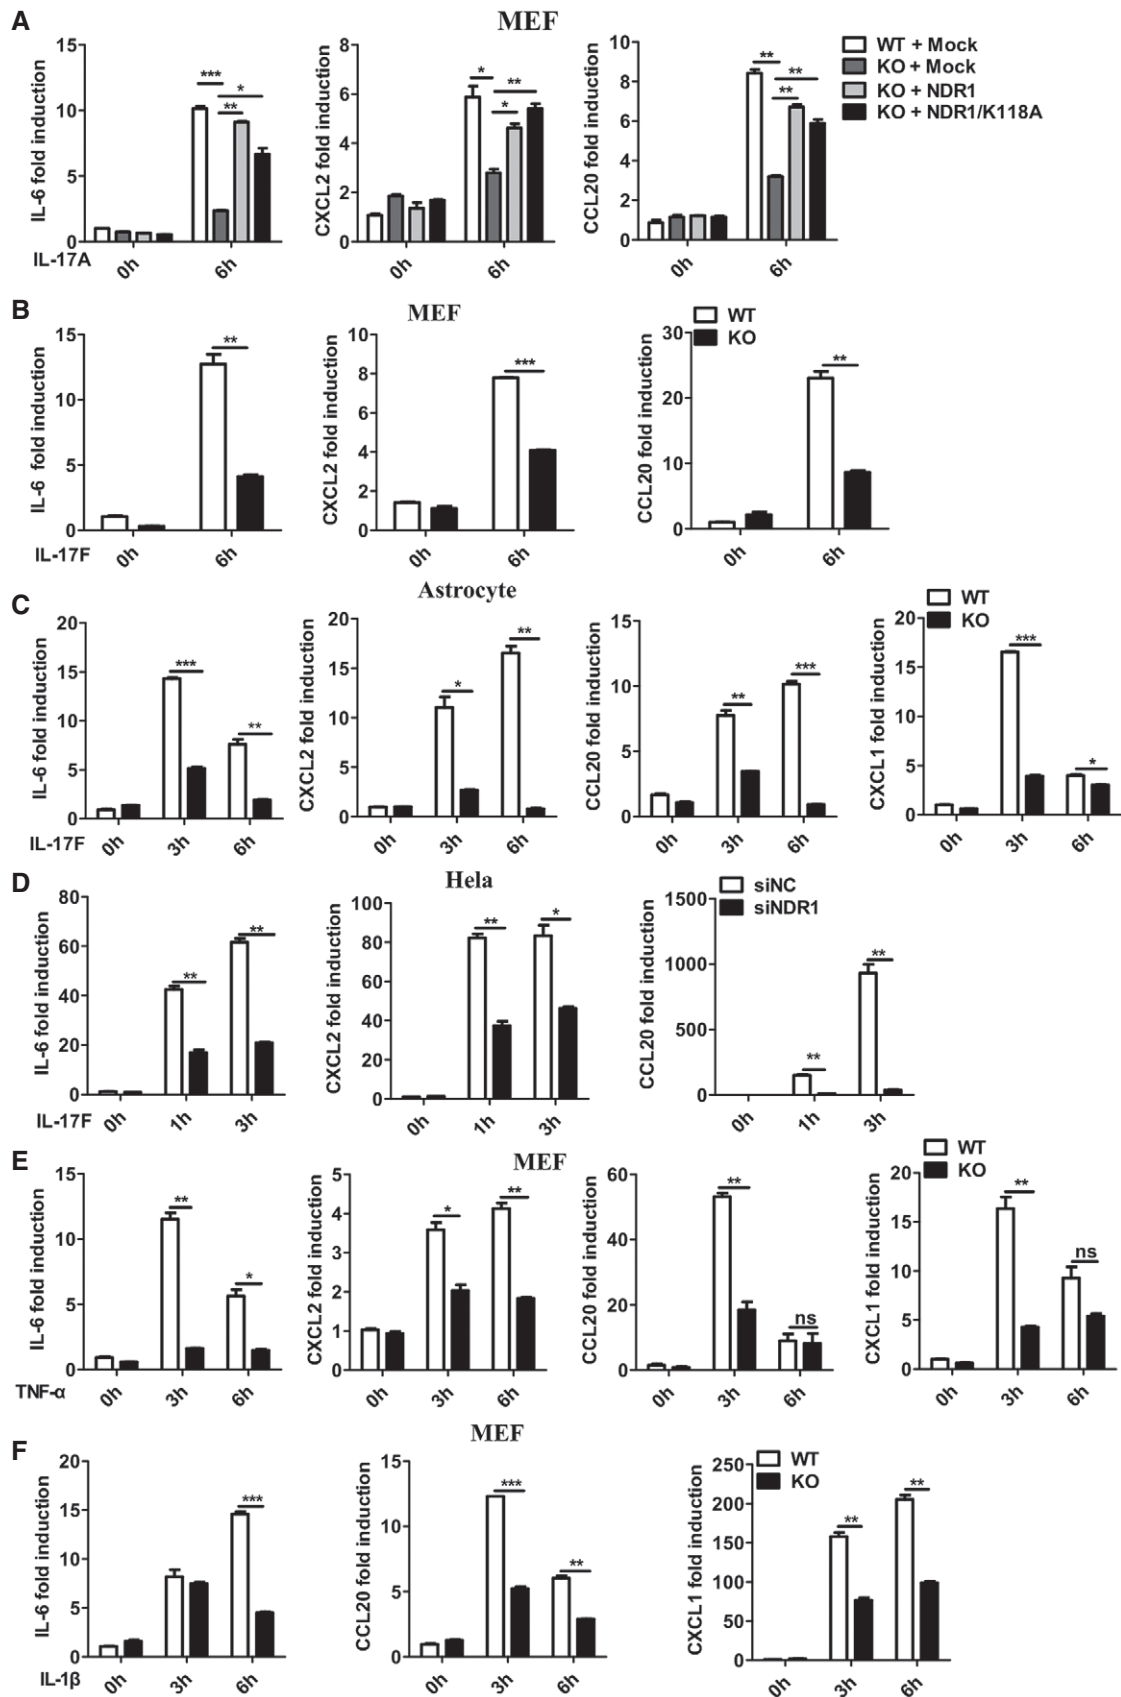

Figure EV2.

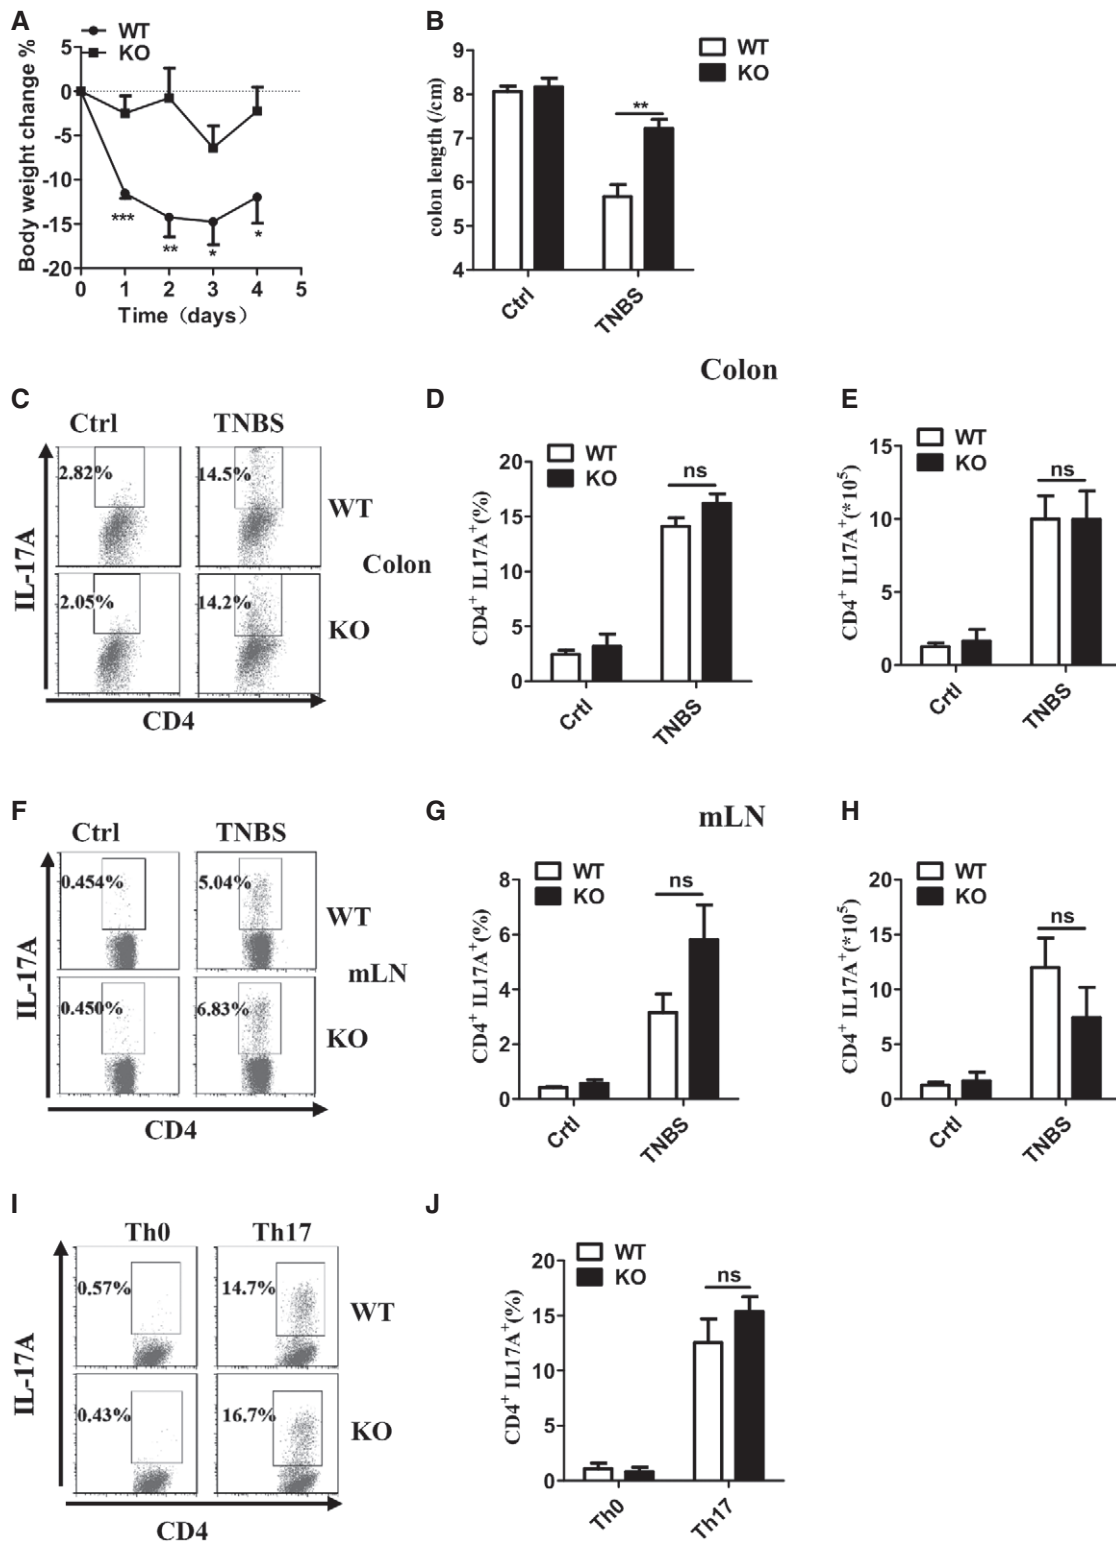

Figure EV3.

**Figure EV3. NDR1 deficiency does not affect Th17 cell production *in vivo* and *in vitro*.**

- A, B WT ( $n = 6$ ) and *Ndr1*-KO ( $n = 5$ ) mice were presensitized with 1% TNBS and then were rectally injected with TNBS at a dose of 150 mg/kg body weight on day 7. Changes in body weight (A) and colon length (B) were measured in WT and *Ndr1*-KO mice with TNBS for a total of 4 days. Mice were euthanized on day 4.
- C–E Colons were collected on day 4; then, colonic propria cells were separated and stained with anti-mouse markers CD4 and IL-17A and then analyzed by flow cytometry. A representative plot of Th17 cell frequency (C) and a summary graph of Th17 cell frequency (D) and number (E) were showed.
- F–H The mesenteric lymph node cells were treated as in Fig 3C. A representative plot of Th17 cell frequency (F) and a summary graph of Th17 cell frequency (G) and number (H) were showed.
- I, J Naive CD4<sup>+</sup> T cells (CD44<sup>lo</sup>CD62L<sup>hi</sup>) isolated from *Ndr1*-KO mice and control littermates (WT) were stimulated for 7 days with anti-CD3 and anti-CD28 under Th0 or Th17 conditions as described in the Materials and Methods section. Flow cytometry was used to measure the frequency of IL-17-producing cells, which is shown a representative plot (I) and a summary graph (J).

Data information: ns, not significant, \* $P < 0.05$ , \*\* $P < 0.01$  and \*\*\* $P < 0.001$  (unpaired, two-tailed Student's *t*-test). Similar results were obtained in three independent experiments. Error bars are mean  $\pm$  SEM values.

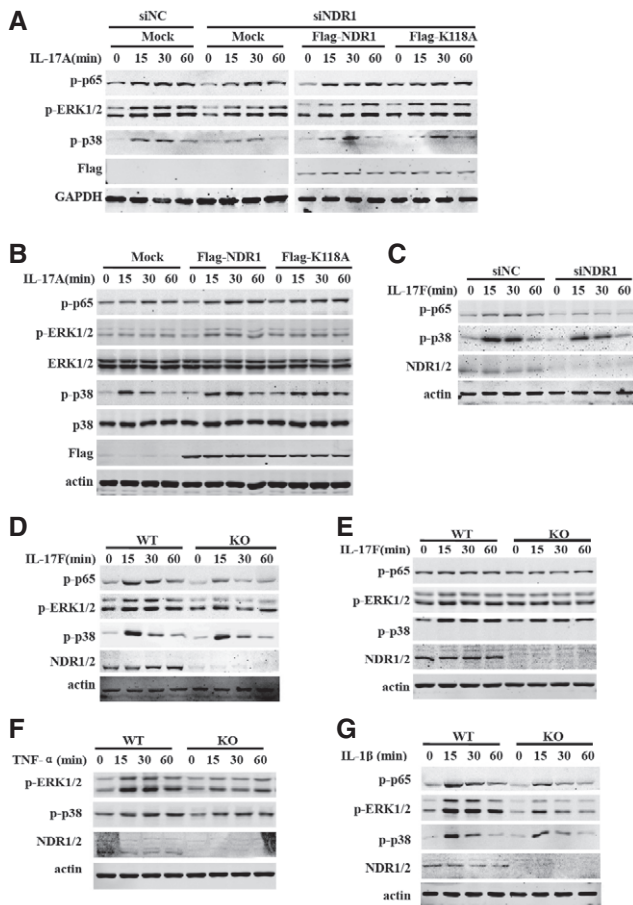**Figure EV4. NDR1 promotes IL-17A and IL-17F signaling.**

- A HeLa cells were transfected with NDR1 siRNA or control siRNA for 24 h and then were transfected with empty vectors or plasmids encoding Flag-NDR1 or Flag-NDR1/K118A for 48 h. The cells were stimulated with 50 ng/ml IL-17 for 0, 15, 30, or 60 min, and the whole cell lysates were immunoblotted with the indicated antibodies.
- B HeLa cells were transfected with mock or plasmids encoding Flag-NDR1 or Flag-NDR1/K118A and then stimulated with IL-17 (50 ng/ml) for 0, 15, 30, or 60 min. Whole cell lysates were immunoblotted with the indicated antibodies.
- C HeLa cells were transfected with NDR1 siRNA or control siRNA and then were treated with IL-17F (50 ng/ml) for 0, 15, 30, or 60 min. Whole cell lysates were immunoblotted with the indicated antibodies.
- D, E *Ndr1*-KO MEFs (D) or primary astrocytes (E) were treated with IL-17F (100 ng/ml) for 0, 15, 30, or 60 min. Whole cell lysates were immunoblotted with the indicated antibodies.
- F, G WT and *Ndr1*-KO MEFs were treated with TNF- $\alpha$  (20 ng/ml) (F) or IL-1 $\beta$  (10 ng/ml) (G) for 0, 15, 30, or 60 min. Whole cell lysates were immunoblotted with the indicated antibodies.

Data information: Similar results were obtained in three (A, B) or two (C–G) independent experiments.

Source data are available online for this figure.

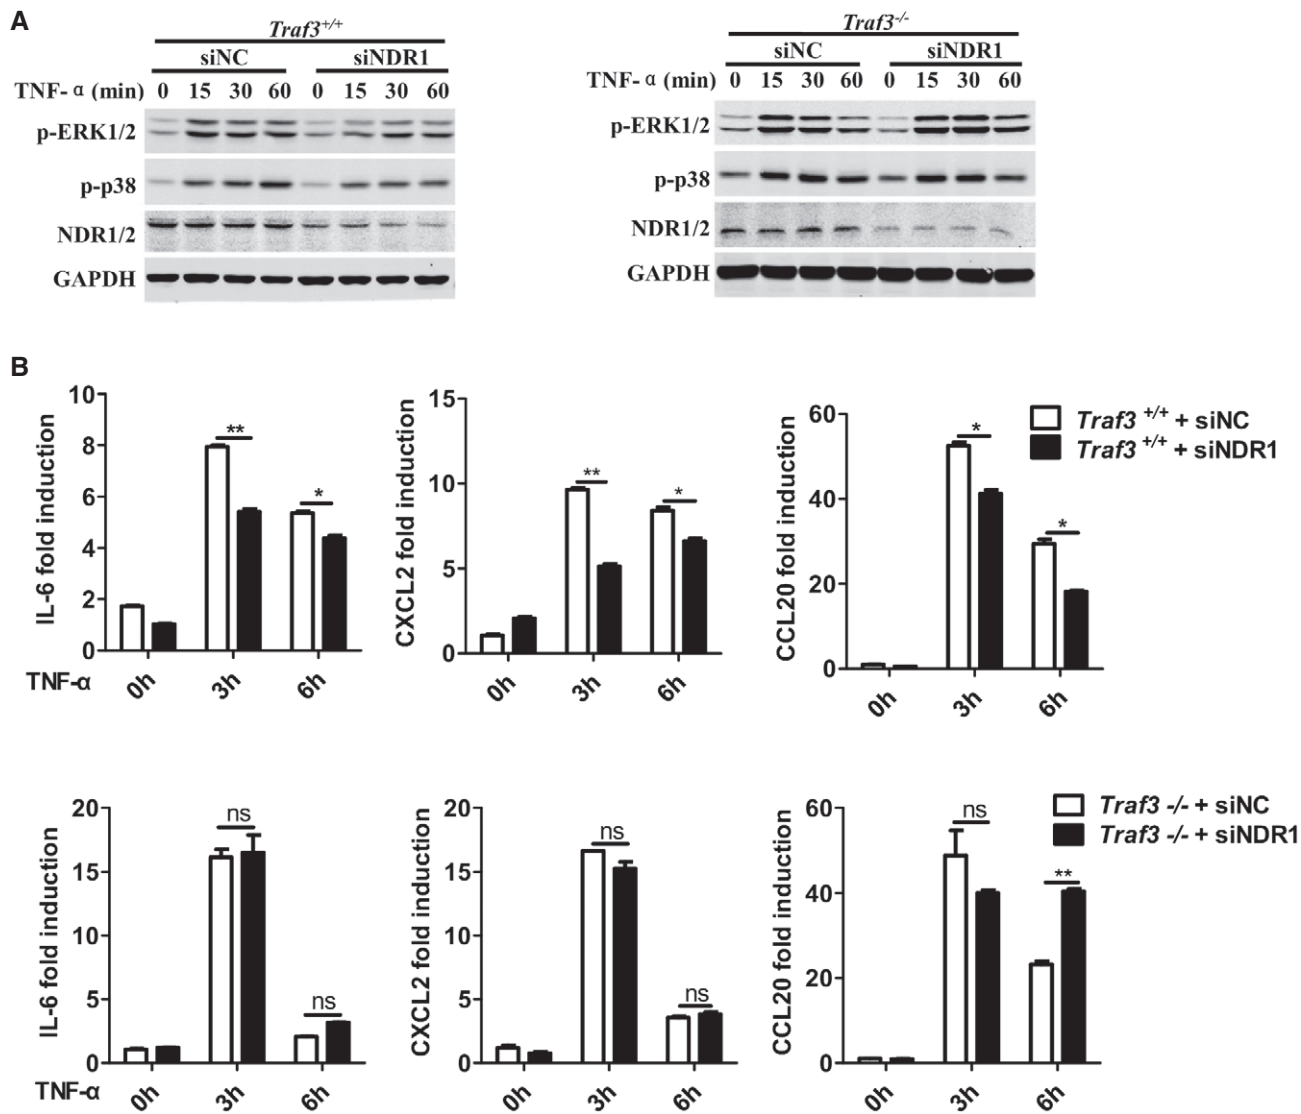

**Figure EV5. NDR1 promotes TNF- $\alpha$  signaling via targeting TRAF3.**

A Wild-type (*Traf3*<sup>+/+</sup>) and TRAF3-deficient (*Traf3*<sup>-/-</sup>) MEFs were transfected with NDR1 siRNA or control siRNA and then stimulated with TNF- $\alpha$  (20 ng/ml) for the indicated times. Whole lysates were subjected to Western blot.

B Real-time PCR analysis of *IL-6*, *CXCL2*, and *CCL20* mRNA expression in MEFs treated as described in (A). \**P* < 0.05 and \*\**P* < 0.01 (unpaired, two-tailed Student's *t*-test). Similar results were obtained in two independent experiments. Error bars are mean  $\pm$  SEM values.

Source data are available online for this figure.
