# Supplementary material
Source: PubMed Central journal article supplement (PMC5376972)

**Figure 6A**

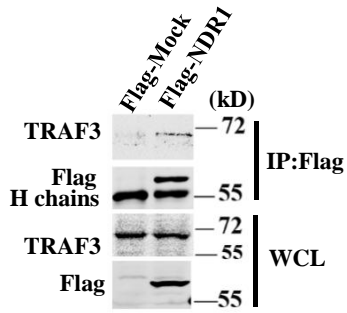

**Full gel for Figure 6A**

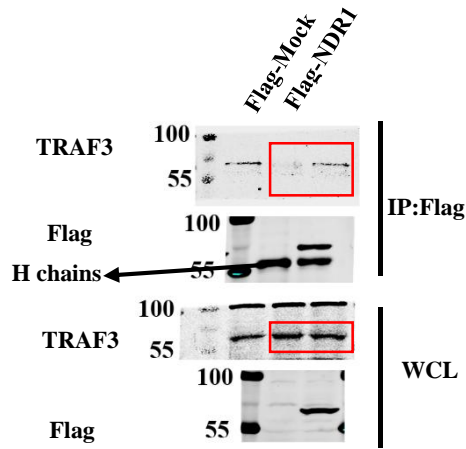

**Figure 6B**

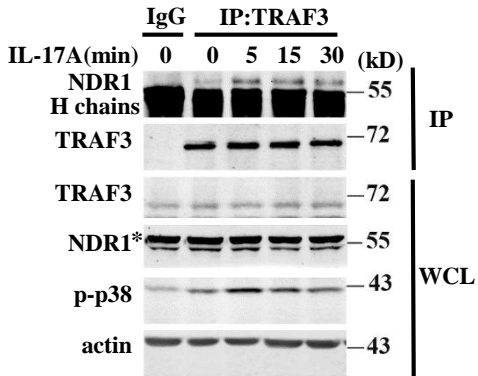

**Full gel for Figure 6B**

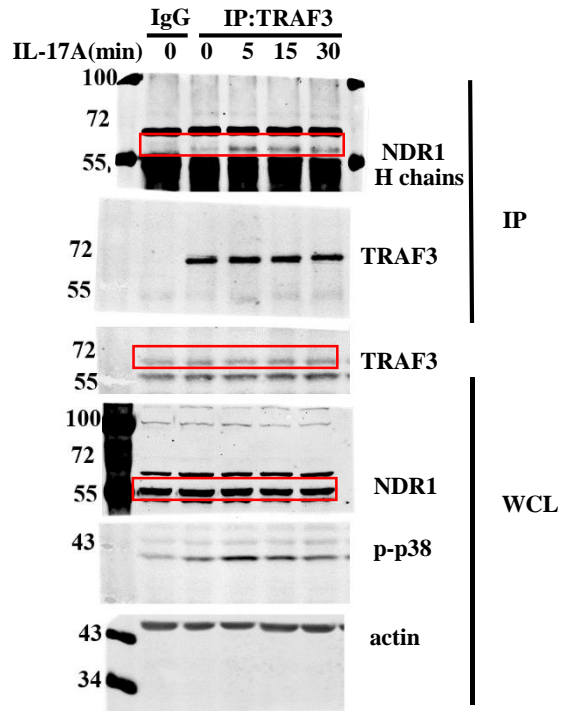

**Figure 6C**

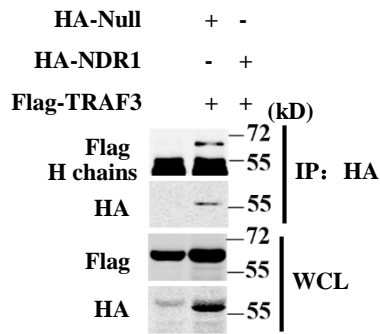

**Full gel for Figure 6C**

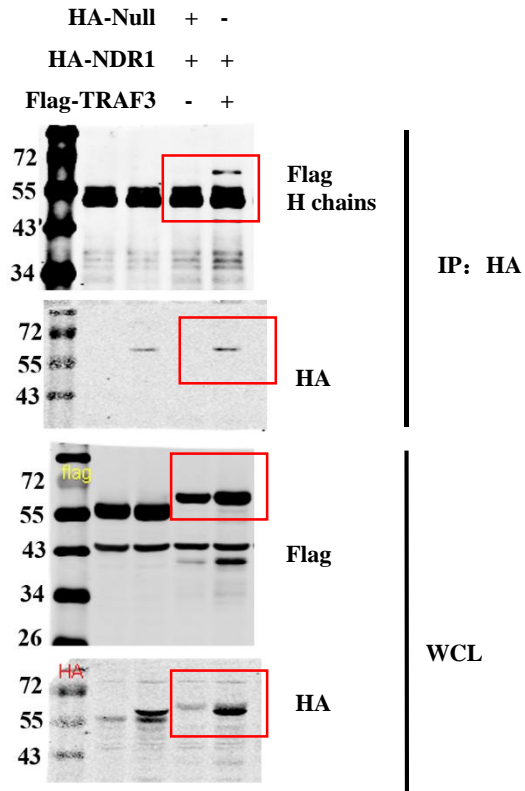

**Figure 6D**

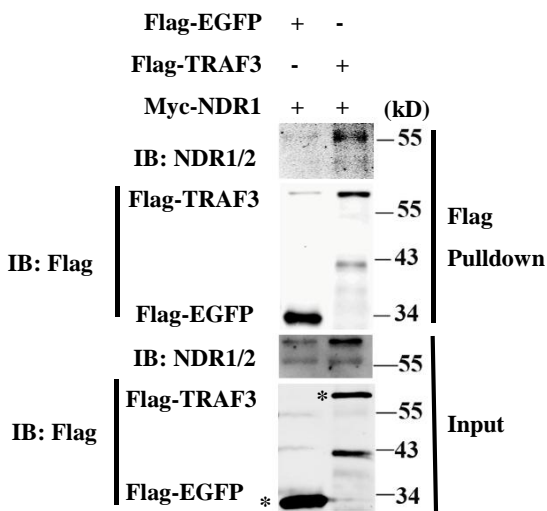

**Full gel for Figure 6D**

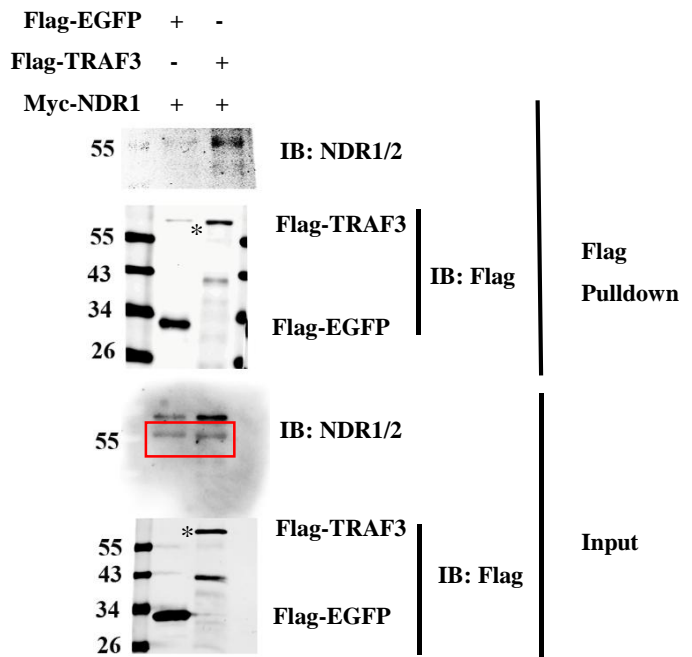



**Figure 6F**

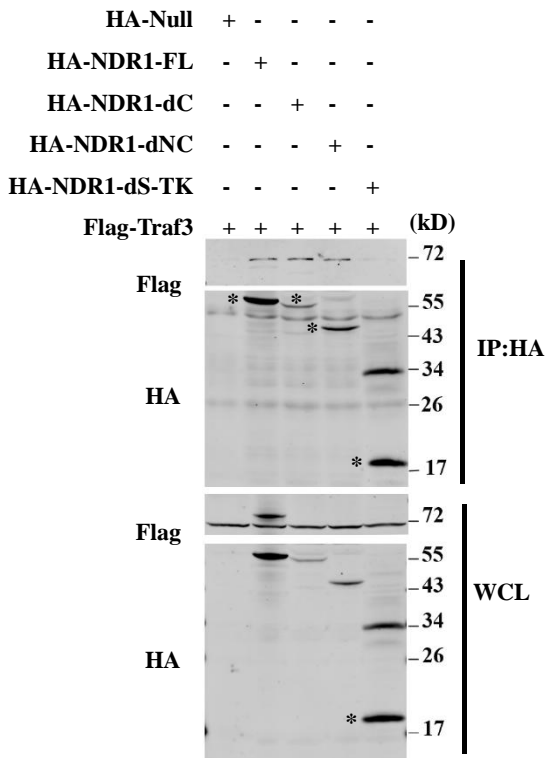

**Full gel for Figure 6F**

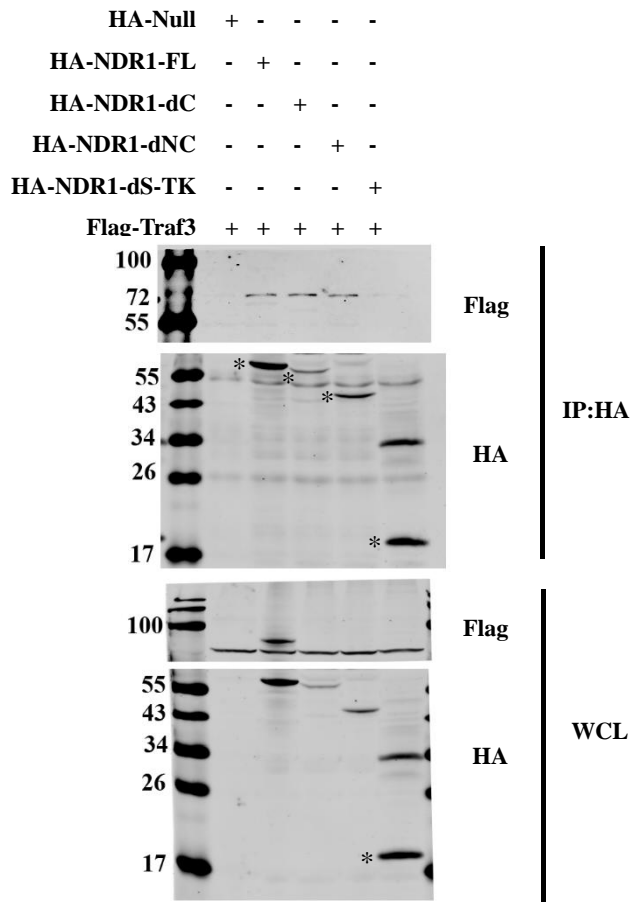

Figure 6G

Full gel for Figure 6G

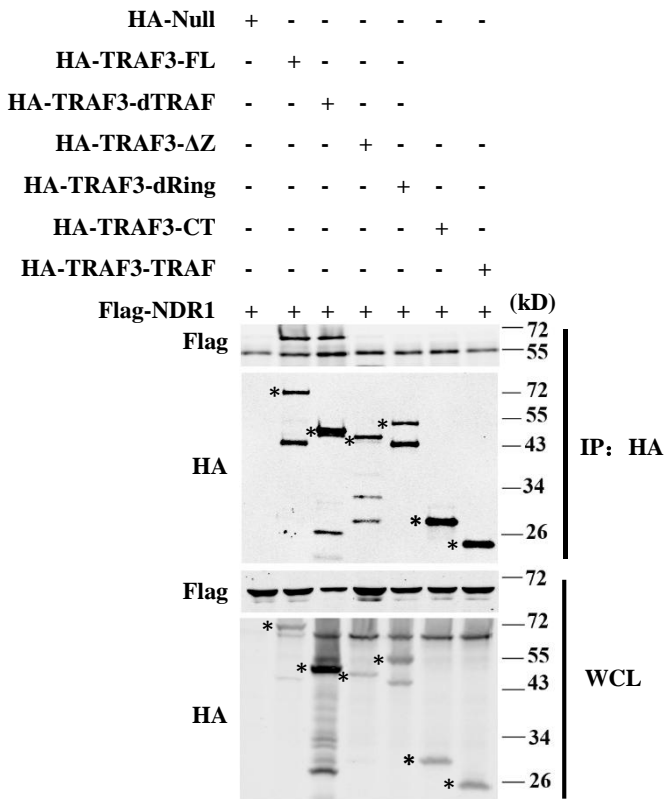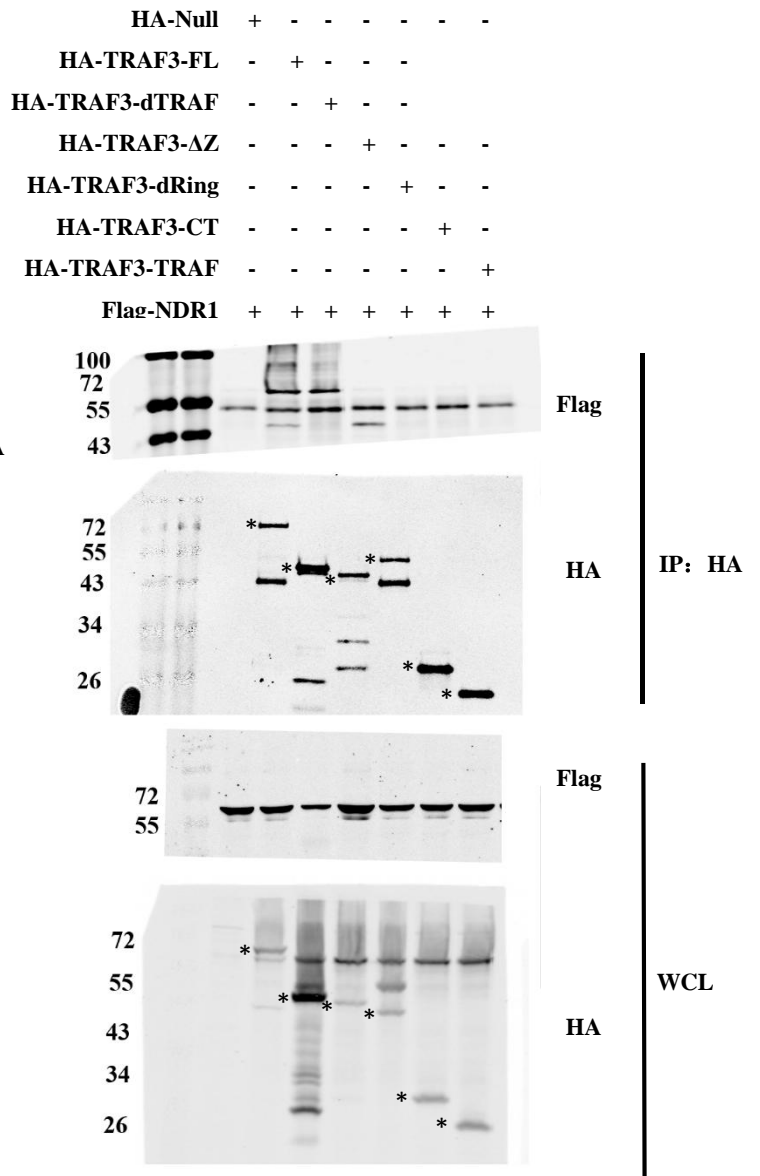

Supplement: EMBR-18-586-s005.pdf [file EMBR-18-586-s005.pdf]
