# Supplementary material
Source: PubMed Central journal article supplement (PMC5376972)

**Figure 8A**

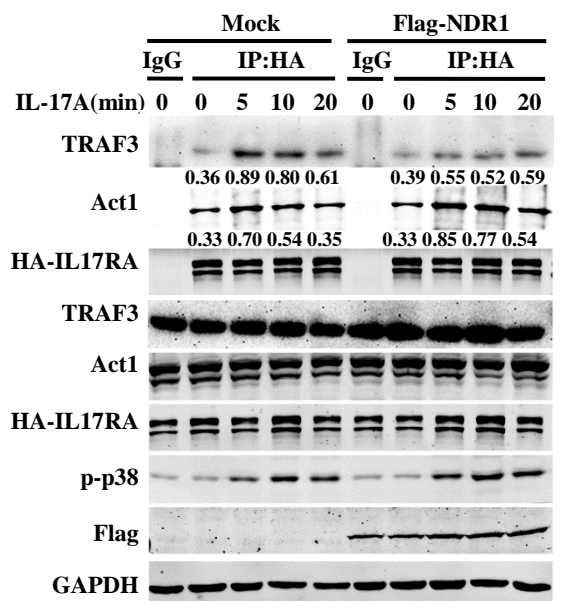

**Full gel for Figure 8A**

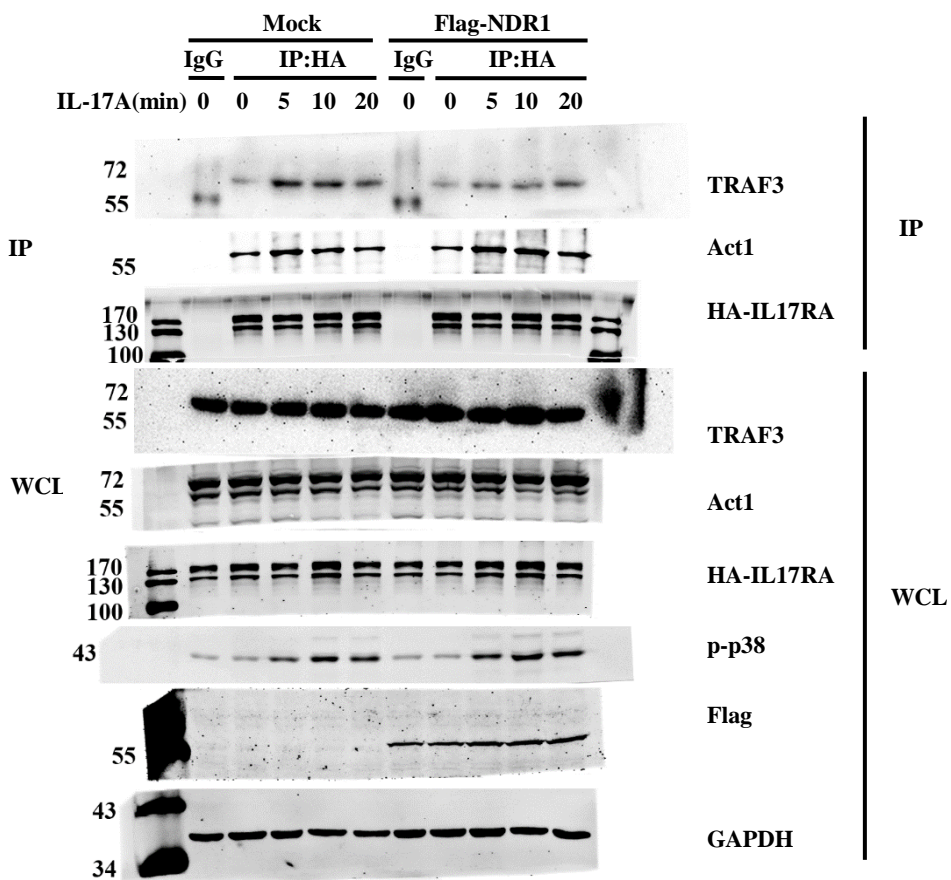

**Figure 8B**

**Full gel for Figure 8B**

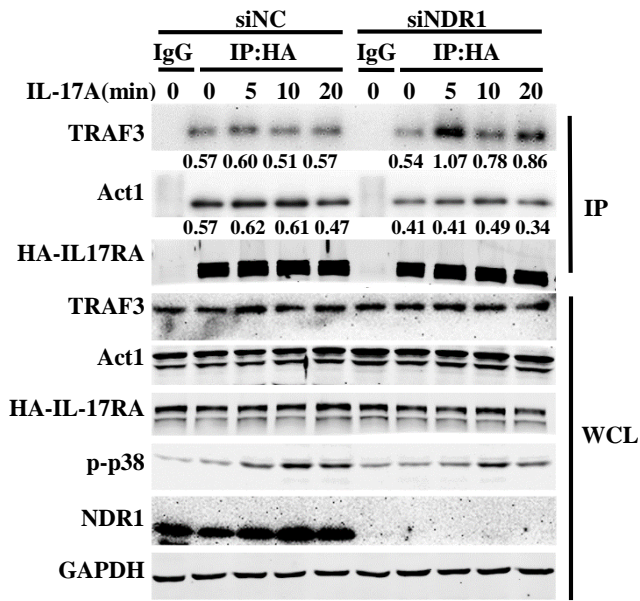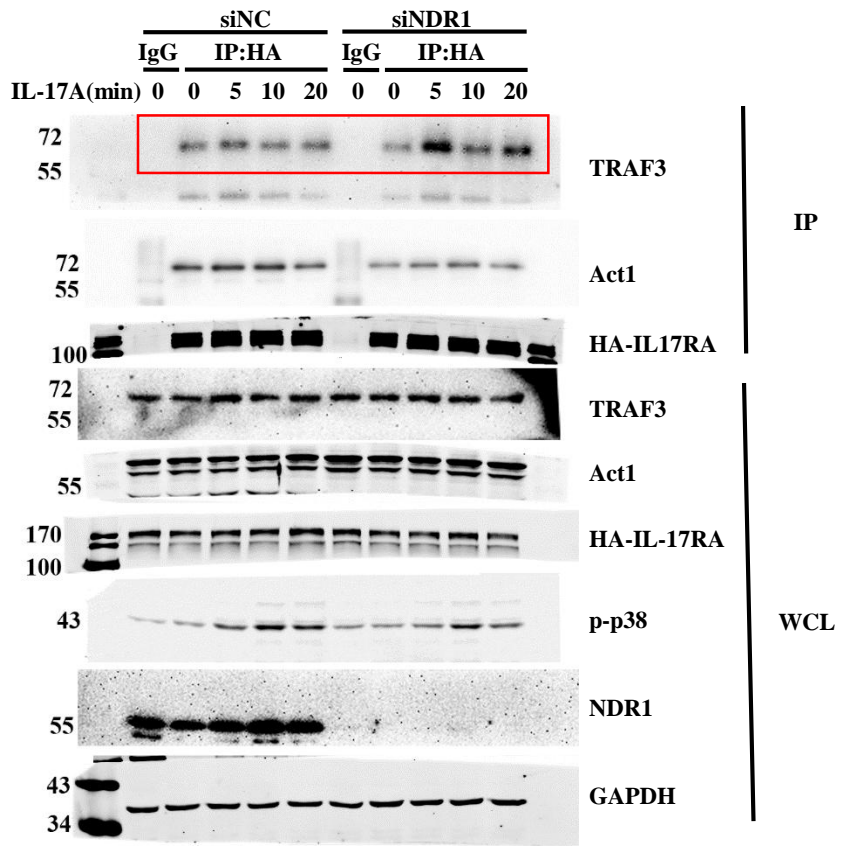

**Figure 8C**

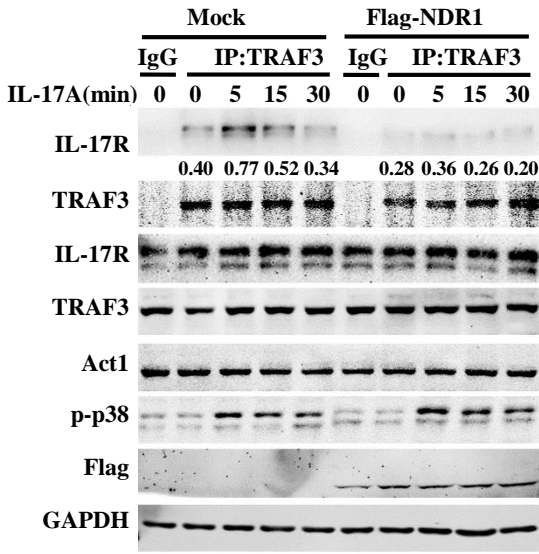

**Full gel for Figure 8C**

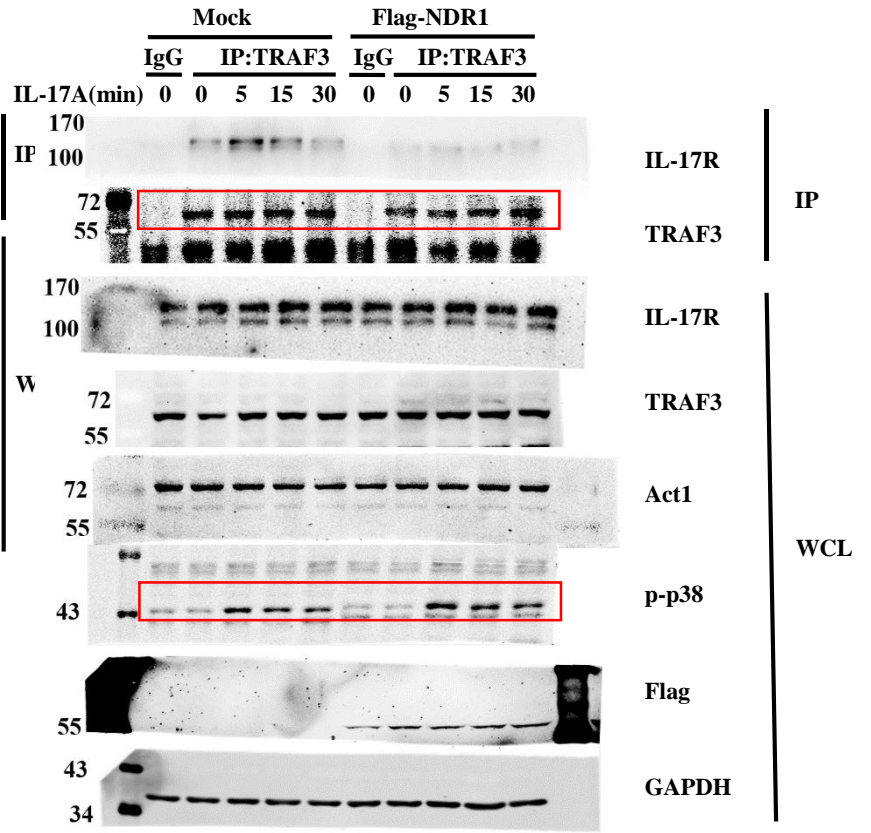

**Figure 8D**

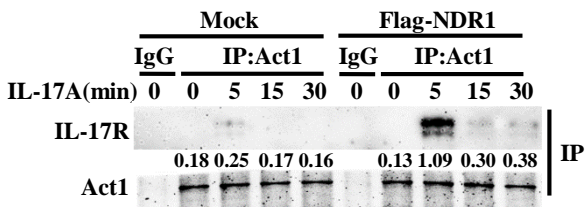

**Full gel for Figure 8D**

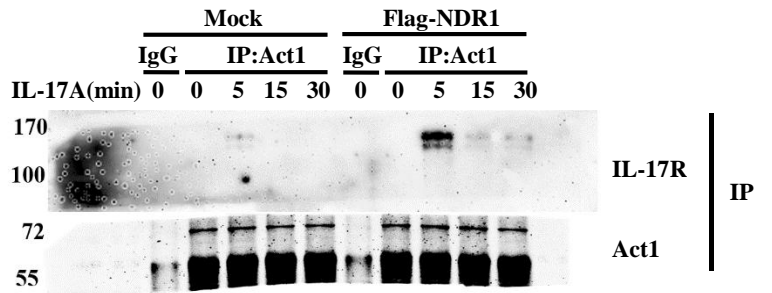

**Figure 8E**

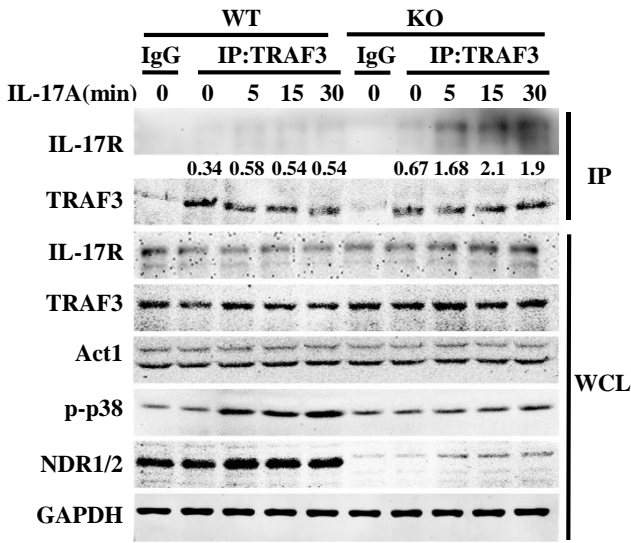

**Full gel for Figure 8E**

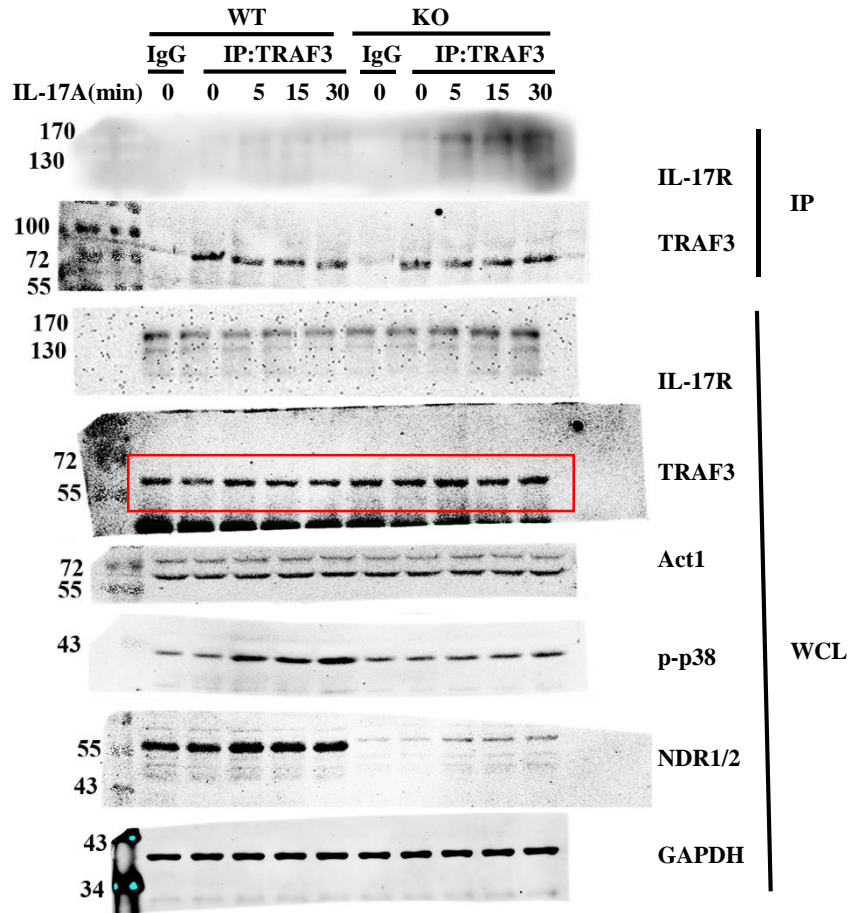

**Figure 8F**

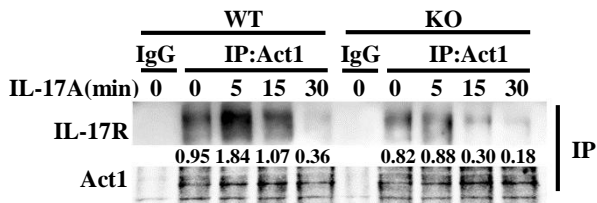

**Full gel for Figure 8F**

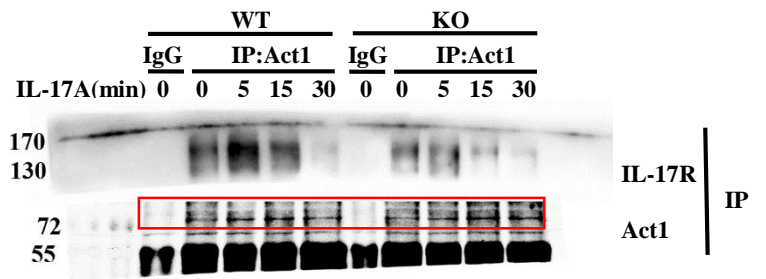

Supplement: EMBR-18-586-s007.pdf [file EMBR-18-586-s007.pdf]
