# Supplementary material
Source: PubMed Central journal article supplement (PMC5376972)

**Figure 2G**

**Full gel for Figure 2G**

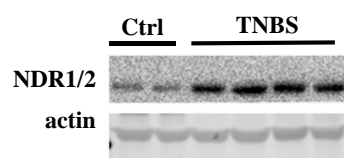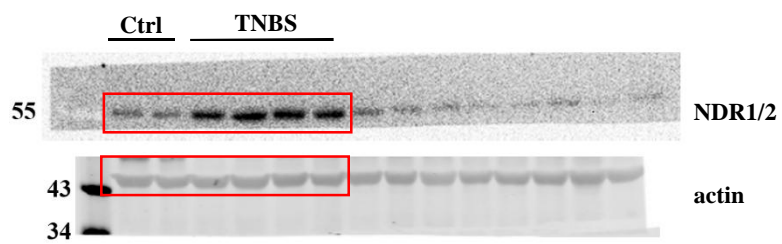

Supplement: EMBR-18-586-s003.pdf [file EMBR-18-586-s003.pdf]

**Figure 5D**

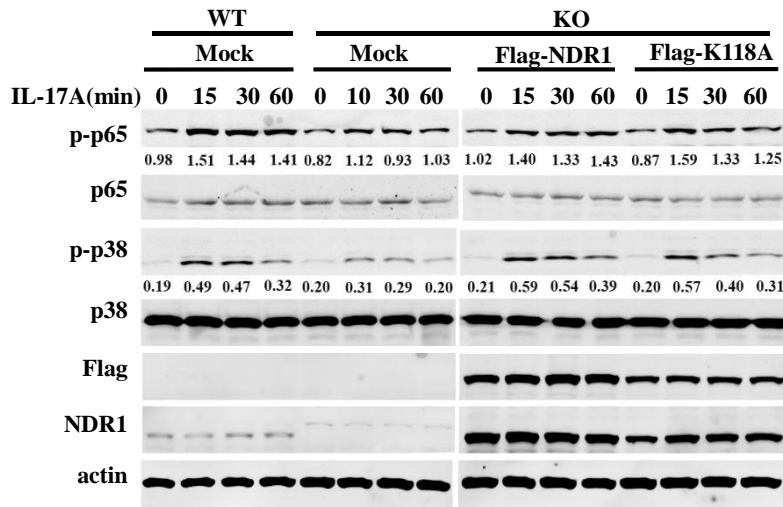

**Full gel for Figure 5D**

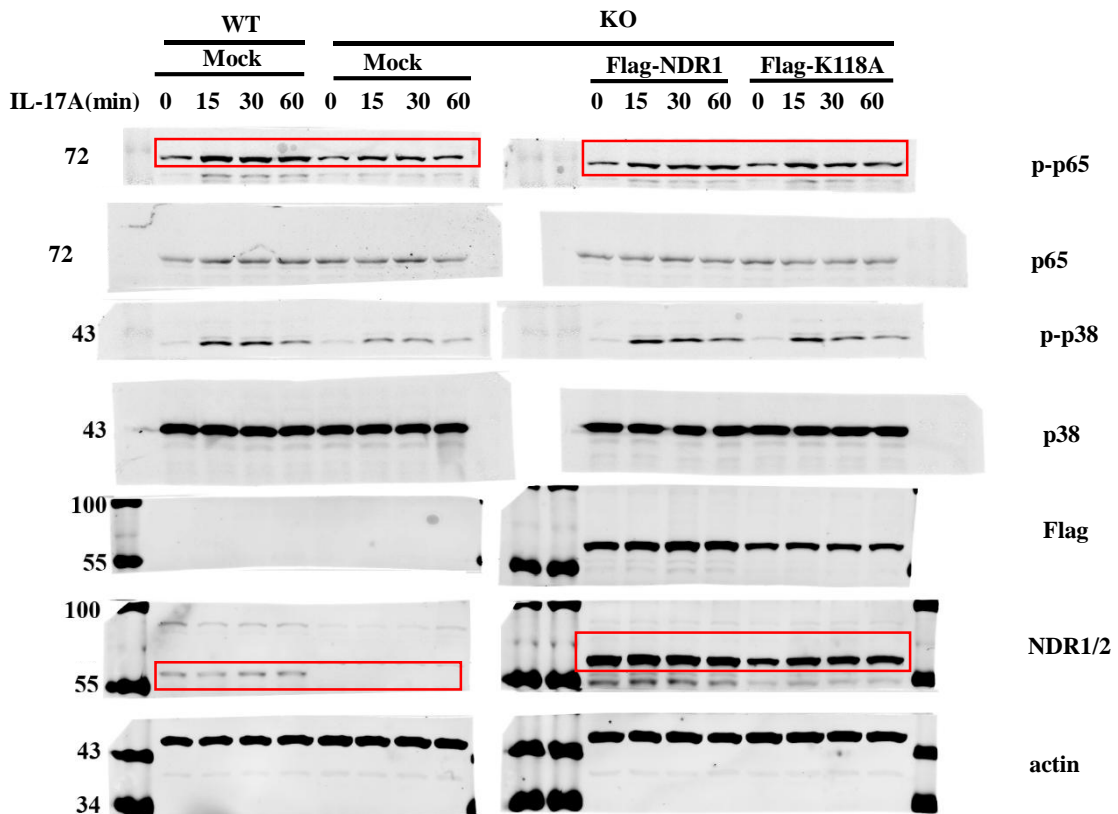

Supplement: EMBR-18-586-s004.pdf [file EMBR-18-586-s004.pdf]
